# Supplementary material for: Genetic Relatedness of Dengue Viruses in Key West, Florida, USA, 2009–2010
Source: PubMed Central journal article supplement (PMC3647415; doi:10.3201/eid1904.121295), 2013-04
Supplement: 12-1295-Techapp-s1.pdf [file 12-1295-Techapp-s1.pdf]

Article DOI: <http://dx.doi.org/10.3201/eid1904.121295>

# Genetic Relatedness of Dengue Viruses in Key West, Florida, USA, 2009–2010

## Technical Appendix

Table 1. Dengue virus type I envelope gene reverse transcription PCR primers used in a study of the genetic relatedness of dengue viruses in Key West, Florida, USA, 2009–2010

| Primer name | Sequence                   | Position  |
|-------------|----------------------------|-----------|
| D1–1        | AGTTGTTAGTCTACGTGGACCGAC   | 1–24      |
| cD1–2086    | CACCTGCTCCTACCACGATGTAGC   | 2065–2085 |
| D1–1880     | CAGCATGGAAGTCTTCTGGTGCAG   | 1881–1904 |
| cD1–4196    | GAGGAGTGAAGTCTTAGTAGGATGCT | 4173–4196 |

Table 2. Dengue virus type I strains used in a study of the genetic relatedness of dengue viruses in Key West, Florida, USA, 2009–2010

| Taxa label                      | Geography                     | Collection year | GenBank accession no. |
|---------------------------------|-------------------------------|-----------------|-----------------------|
| ARC-39–2010                     | Key West, Florida, USA        | 2010            | JQ045564              |
| Brazil 2003                     | Brazil                        | 2003            | JF804014              |
| People's Republic of China 1980 | People's Republic of China    | 1980            | AF350498              |
| Colombia 1985                   | Colombia                      | 1985            | AF425616              |
| Colombia 2007                   | Colombia                      | 2007            | JF804015              |
| Costa Rica 2005                 | Costa Rica                    | 2005            | JF804016              |
| Dominican Rep. 2007             | Dominican Republic            | 2007            | JF804017              |
| Haiti 2010                      | Haiti                         | 2010            | JF969282              |
| Hawaii 1944                     | Hawaii                        | 1944            | AB609588              |
| Indonesia 1988                  | Indonesia                     | 1988            | AB074761              |
| Key West KW10AG                 | Key West, Florida, USA        | 2010            | JF519855              |
| KW-Monroe/2009*                 | Key West, Florida, USA        | 2009            | JQ425061              |
| KW-Monroe/2009*                 | Key West, Florida, USA        | 2009            | JQ425062              |
| KW-Monroe/2009*                 | Key West, Florida, USA        | 2009            | JQ425063              |
| KW-Monroe/2009*                 | Key West, Florida, USA        | 2009            | JQ425068              |
| KW-Monroe/2010*                 | Key West, Florida, USA        | 2010            | JQ425069              |
| KW-Monroe/2010*                 | Key West, Florida, USA        | 2010            | JQ425070              |
| KW-Monroe/2010*                 | Key West, Florida, USA        | 2010            | JQ425071              |
| KW-Monroe/2010*                 | Key West, Florida, USA        | 2010            | JQ425072              |
| FL-Orange/2009*                 | Orange County, Florida, USA   | 2009            | JQ425064              |
| FL-Pinellas/2009*               | Pinellas County, Florida, USA | 2009            | JQ425065              |
| FL-Broward/2009*                | Broward County, Florida, USA  | 2009            | JQ425067              |
| FL-Dade/2009*                   | Dade County, Florida, USA     | 2009            | JQ425066              |
| Malaysia 1972                   | Malaysia                      | 1972            | AF425622              |
| Martinique 1989                 | Martinique                    | 1989            | JF804018              |
| Mexico 1995                     | Mexico                        | 1995            | DQ341194              |
| Mexico 2007                     | Mexico                        | 2007            | HQ166036              |
| Mexico 2008                     | Mexico                        | 2008            | GU131965              |
| Myanmar 1976                    | Myanmar                       | 1976            | AF425615              |
| Nicaragua 2005                  | Nicaragua                     | 2005            | FJ850113              |
| Nicaragua 2008                  | Nicaragua                     | 2008            | GQ199858              |
| Nigeria 1968                    | Nigeria                       | 1968            | AF425625              |
| Philippines 2004                | Philippines                   | 2004            | JF804020              |
| Puerto Rico 1998                | Puerto Rico                   | 1998            | JF804021              |
| Singapore 2008                  | Singapore                     | 2008            | JN022600              |
| St. John 1987                   | St. John, US Virgin Islands   | 1987            | JF804023              |
| Tahiti 2001                     | Tahiti                        | 2001            | JF804024              |

|                |                     |      |          |
|----------------|---------------------|------|----------|
| Thailand 1964  | Thailand            | 1964 | AF180817 |
| Thailand 1997  | Thailand            | 1997 | JF804025 |
| Thailand 2004  | Thailand            | 2004 | JF812100 |
| Thailand 2006  | Thailand            | 2006 | JF812097 |
| Thailand 1980  | Thailand            | 1980 | AF425630 |
| Trinidad 1986  | Trinidad and Tobago | 1986 | AF425639 |
| Venezuela 1997 | Venezuela           | 1997 | AF425634 |
| Venezuela 2007 | Venezuela           | 2007 | GU131840 |
| WestPac 1974   | Nauru               | 1974 | M23027   |

---

\*Virus isolates sequenced for this study
